# Supplementary material for: Hydrogen-bonding patterns in a series of multi-component molecular solids formed by 2,3,5,6-tetramethylpyrazine with selected carboxylic acids
Source: Royal Society of Chemistry journal article supplement (doi:10.1039/c4ce00749b), 2014-01-01
Supplement: c4ce00749b1.pdf [file c4ce00749b1.pdf]

## Supporting information for this article:

IR curves

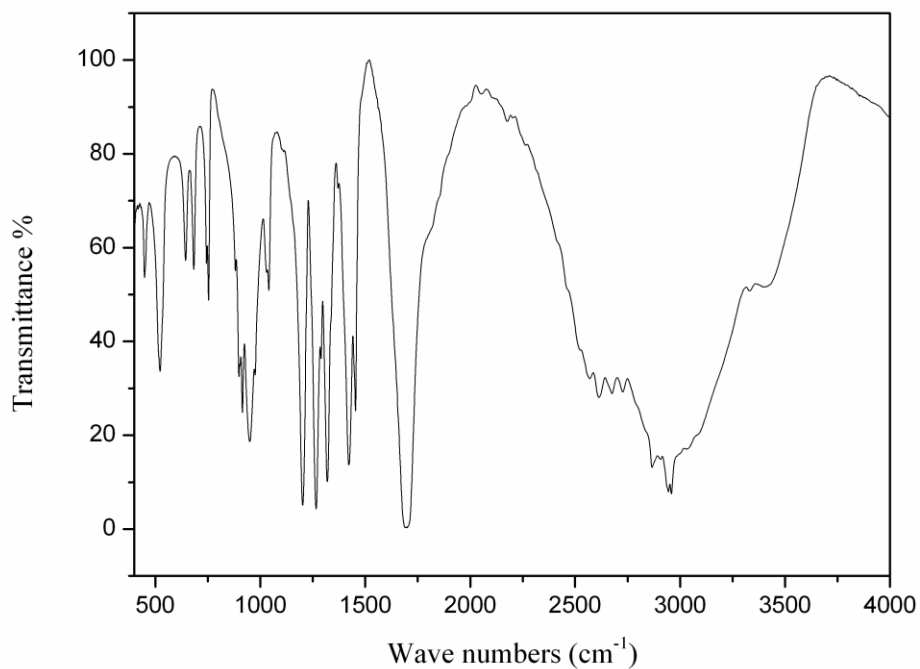

The IR curve of **1**

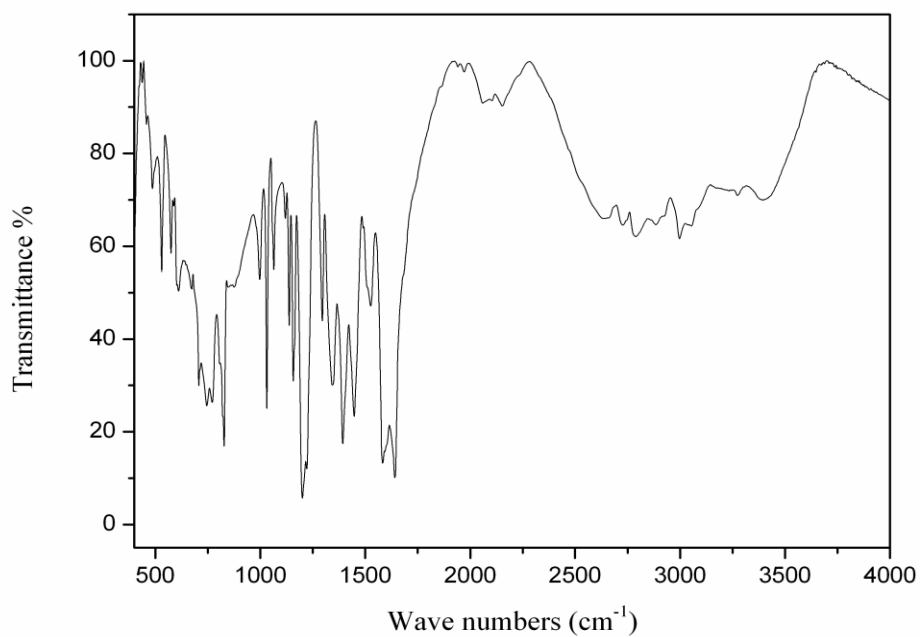

The IR curve of **2**

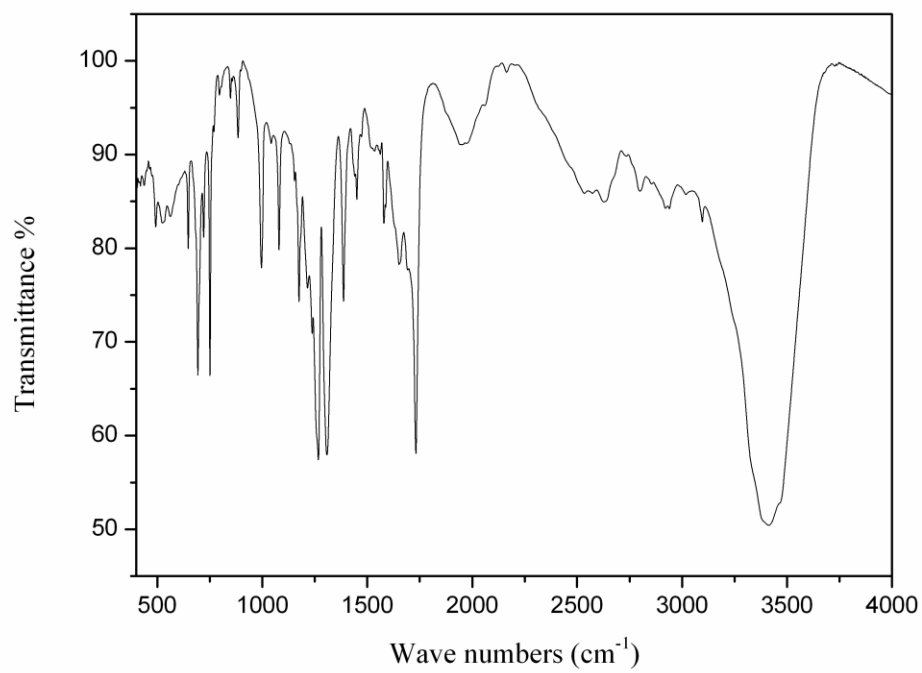

The IR curve of **3**

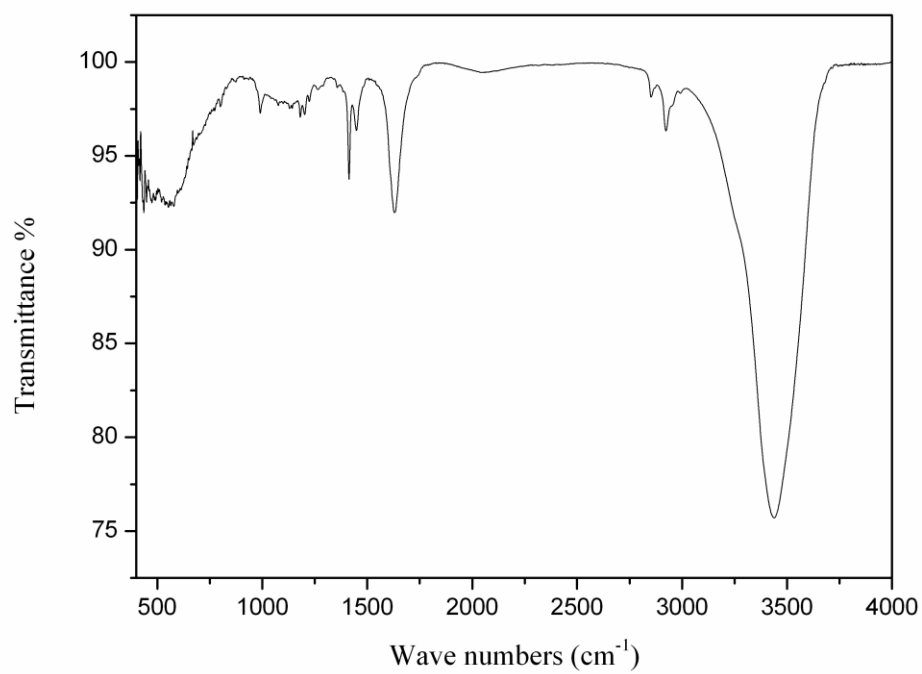

The IR curve of **4**

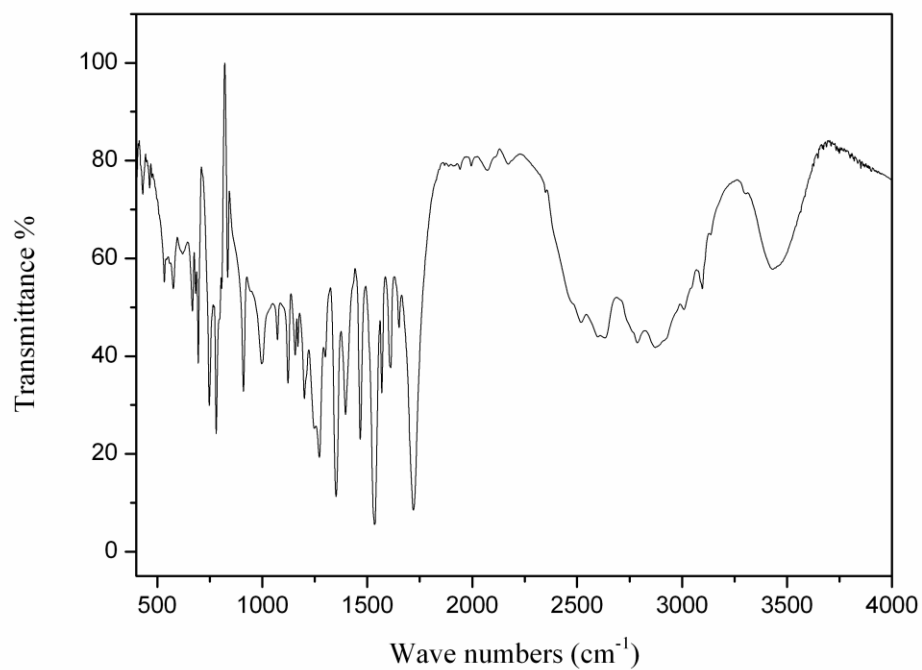

The IR curve of **5**

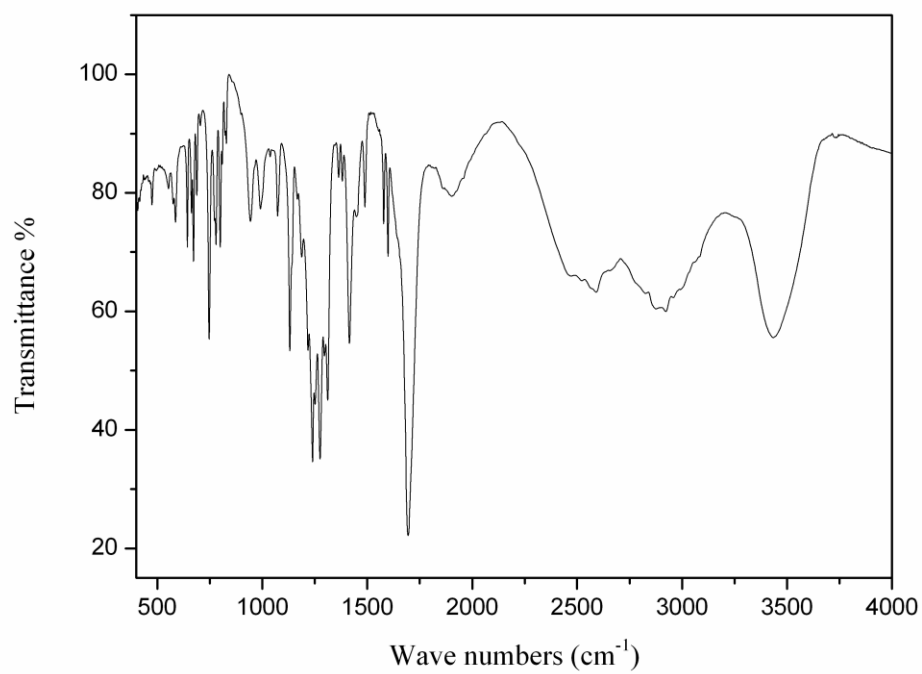

The IR curve of **6**

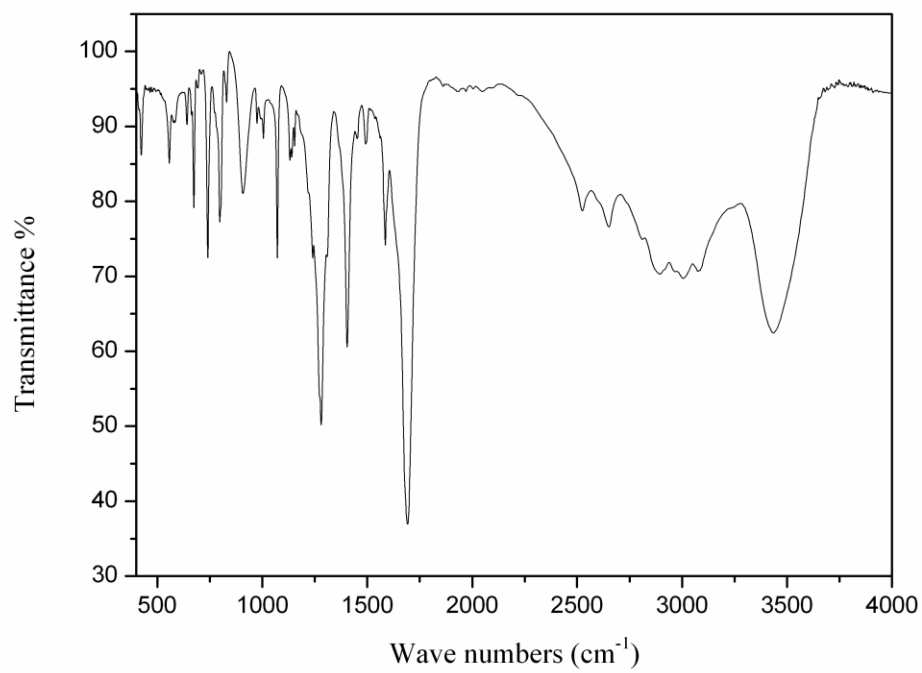

The IR curve of **7**

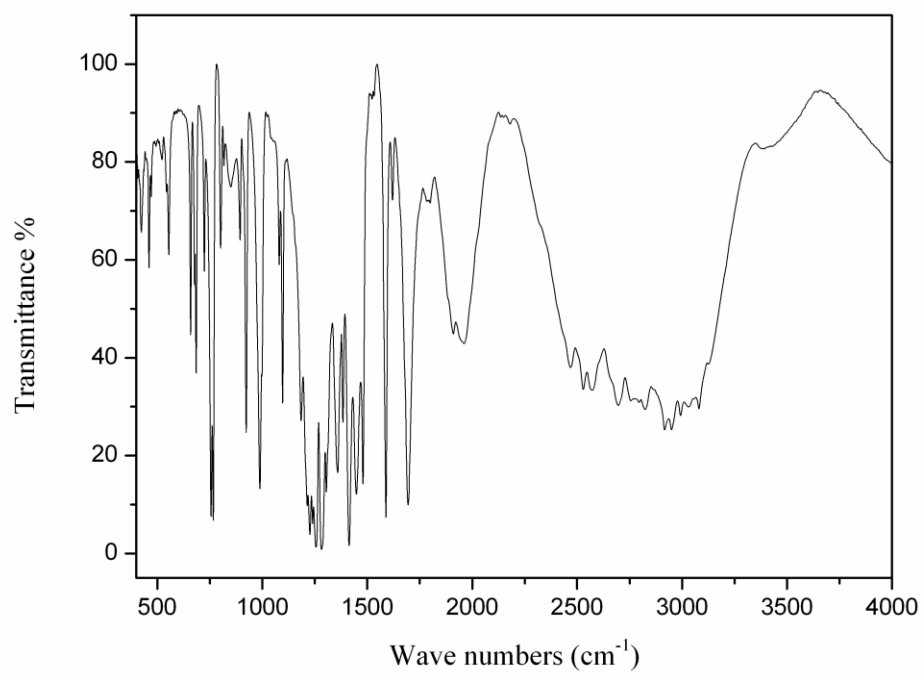

The IR curve of **8**
